# Supplementary material for: The Dynamic Changes of Brassica napus Seed Microbiota across the Entire Seed Life in the Field
Source: MDPI journal article supplement (doi:10.3390/plants13060912), 2024-03-21
Supplement: s1 [file s1]

**Table S1 Total numbers of reads among all samples before analysis and the number of counts after concatenation and optimization.**

| <b>Groups</b> | <b>Sample name</b> | <b>Q30(%)</b> | <b>Reads</b> | <b>Counts</b> | <b>Goods_coverage</b> |
|---------------|--------------------|---------------|--------------|---------------|-----------------------|
| Flower buds   | 0d-Flower1         | 94.46         | 47115        | 36250         | 0.999715              |
|               | 0d-Flower2         | 94.42         | 64692        | 51909         | 0.999829              |
|               | 0d-Flower3         | 94.43         | 67630        | 58644         | 0.999145              |
|               | 0d-Flower4         | 94.13         | 56639        | 47506         | 0.999259              |
|               | 0d-Flower5         | 93.8          | 28543        | 21197         | 0.999943              |
|               | 0d-Flower6         | 94.21         | 45390        | 35080         | 0.999601              |
|               | 0d-Flower7         | 94.05         | 87170        | 75506         | 0.999943              |
| Young pods    | Young pod1         | 94.01         | 181140       | 148922        | 0.999943              |
|               | Young pod2         | 93.9          | 218539       | 159068        | 0.999031              |
|               | Young pod3         | 94.1          | 198094       | 153293        | 0.999145              |
|               | Young pod4         | 93.83         | 23759        | 19967         | 0.999943              |
|               | Young pod5         | 94.04         | 96417        | 75399         | 0.999373              |
|               | Young pod6         | 94.15         | 123265       | 92964         | 0.999373              |
|               | Young pod7         | 94.03         | 35372        | 28448         | 0.999772              |
| 20daf seeds   | 20daf-seeds1       | 94.82         | 78859        | 59919         | 0.998974              |
|               | 20daf-seeds2       | 94.39         | 72858        | 56035         | 0.999259              |
|               | 20daf-seeds3       | 94.43         | 80743        | 65745         | 0.998404              |
|               | 20daf-seeds4       | 93.11         | 42250        | 20287         | 0.999772              |
|               | 20daf-seeds5       | 94.23         | 60362        | 40811         | 0.999772              |
|               | 20daf-seeds6       | 94.55         | 101093       | 73286         | 0.998746              |
|               | 20daf-seeds7       | 94.52         | 51371        | 25531         | 0.999829              |
|               | 20daf-seeds8       | 94.51         | 31818        | 25133         | 0.999886              |
| 30daf seeds   | 30daf-seeds1       | 94.09         | 52385        | 36452         | 0.999772              |
|               | 30daf-seeds2       | 94.39         | 63745        | 55000         | 0.999658              |
|               | 30daf-seeds3       | 94.25         | 27476        | 20812         | 0.999943              |
|               | 30daf-seeds4       | 94.03         | 55310        | 46632         | 0.999772              |
|               | 30daf-seeds5       | 94.14         | 30851        | 26816         | 0.999886              |
|               | 30daf-seeds6       | 94.33         | 67647        | 52345         | 0.999544              |
| 40daf seeds   | 40daf-seeds1       | 94.04         | 183192       | 119256        | 0.999145              |
|               | 40daf-seeds2       | 93.08         | 70581        | 35361         | 0.999145              |
|               | 40daf-seeds3       | 93.71         | 25830        | 17546         | 0.999943              |
|               | 40daf-seeds4       | 94.12         | 68650        | 50644         | 0.99886               |
|               | 40daf-seeds5       | 94.36         | 40422        | 33420         | 0.999544              |
|               | 40daf-seeds6       | 94.31         | 49522        | 39287         | 0.999316              |
|               | 40daf-seeds7       | 94.47         | 71784        | 57001         | 0.998404              |
|               | 40daf-seeds8       | 94.31         | 69520        | 53152         | 0.99886               |

| Groups           | Sample name     | Q30(%) | Reads  | Counts | Goods_coverage |
|------------------|-----------------|--------|--------|--------|----------------|
| 50daf seeds      | 50daf-seeds1    | 94.55  | 58712  | 39620  | 0.999886       |
|                  | 50daf-seeds2    | 94.37  | 67725  | 37314  | 0.999715       |
|                  | 50daf-seeds3    | 94.4   | 30031  | 19878  | 0.999829       |
|                  | 50daf-seeds4    | 94.56  | 59107  | 46176  | 0.999316       |
|                  | 50daf-seeds5    | 94.37  | 27116  | 20679  | 1              |
|                  | 50daf-seeds6    | 94.39  | 45080  | 26888  | 1              |
|                  | 50daf-seeds7    | 94.39  | 41183  | 24371  | 0.999829       |
| Parental seeds   | Parental seeds1 | 91.54  | 66566  | 39082  | 0.996389539    |
|                  | Parental seeds2 | 92.46  | 71072  | 57764  | 0.992291179    |
|                  | Parental seeds3 | 91.08  | 125530 | 95679  | 0.996487119    |
|                  | Parental seeds4 | 91.15  | 126545 | 82683  | 0.992096019    |
|                  | Parental seeds5 | 91.32  | 36827  | 23405  | 0.99834114     |
|                  | Parental seeds6 | 91.29  | 64731  | 41079  | 0.994730679    |
| Mature seeds     | Mature seeds1   | 91.74  | 35009  | 23241  | 0.99736534     |
|                  | Mature seeds2   | 92.8   | 114216 | 77818  | 0.993169399    |
|                  | Mature seeds3   | 91.63  | 176338 | 132119 | 0.99717018     |
|                  | Mature seeds4   | 91.33  | 113115 | 82931  | 0.995608899    |
|                  | Mature seeds5   | 91.51  | 127362 | 99381  | 0.995511319    |
|                  | Mature seeds6   | 91.84  | 102859 | 69662  | 0.99726776     |
| Negative control | YX1             | 90.32  | 39     | 9      |                |
|                  | YX2             | 87.87  | 125    | 53     |                |
|                  | YX3             | 90.06  | 219    | 131    |                |
|                  | YX4             | 87     | 2      | 0      |                |
|                  | YX5             | 87.41  | 121    | 27     |                |
|                  | YX6             | 88.28  | 188    | 47     |                |

**Table S2 The primer sequences used in this study.**

**PCR1-F** bold sequences are the Illumina read1 sequence primer (RD1SP), non-bold sequences are the 799F primer  
**ACACTCTTTCCCTACACGACGCTCTTCCGATCTA**ACMGGATTAGATACCKG

**PCR1-R** bold sequences are the Illumina read2 sequence primer (RD2SP), non-bold sequences are the 1193R primer  
**GTGACTGGAGTTCAGACGTGTGCTCTTCCGATCTA**CGTCATCCCCACCTTCC

| <b>First half of non-bold sequences are adapters P5,</b> |                                                                                           |
|----------------------------------------------------------|-------------------------------------------------------------------------------------------|
| <b>PCR2-F</b>                                            | <b>bold sequences are indexes i5, second half of non-bold sequences are partial RD1SP</b> |
| 1                                                        | AATGATACGGCGACCACCGAGATCTACAC <b>GAGCGCTA</b> CACTCTTTCCCTACACGAC                         |
| 2                                                        | AATGATACGGCGACCACCGAGATCTACAC <b>CGCTCAGT</b> ACACTCTTTCCCTACACGAC                        |
| 3                                                        | AATGATACGGCGACCACCGAGATCTACAC <b>GTCTTAGG</b> ACACTCTTTCCCTACACGAC                        |
| 4                                                        | AATGATACGGCGACCACCGAGATCTACAC <b>ACTGATCG</b> ACACTCTTTCCCTACACGAC                        |
| 5                                                        | AATGATACGGCGACCACCGAGATCTACACA <b>ATTCTG</b> CACTCTTTCCCTACACGAC                          |
| 6                                                        | AATGATACGGCGACCACCGAGATCTACAC <b>GGCCTC</b> ATACACTCTTTCCCTACACGAC                        |
| 7                                                        | AATGATACGGCGACCACCGAGATCTACACA <b>TCTTAGT</b> ACACTCTTTCCCTACACGAC                        |
| 8                                                        | AATGATACGGCGACCACCGAGATCTACAC <b>GCTCCG</b> ACACTCTTTCCCTACACGAC                          |
| 9                                                        | AATGATACGGCGACCACCGAGATCTACAC <b>CGGGCTA</b> CACTCTTTCCCTACACGAC                          |
| 10                                                       | AATGATACGGCGACCACCGAGATCTACAC <b>TTATTCG</b> TACACTCTTTCCCTACACGAC                        |
| 11                                                       | AATGATACGGCGACCACCGAGATCTACAC <b>CTACGAA</b> CACTCTTTCCCTACACGAC                          |
| 12                                                       | AATGATACGGCGACCACCGAGATCTACAC <b>AGCAGATC</b> AACTCTTTCCCTACACGAC                         |
| 13                                                       | AATGATACGGCGACCACCGAGATCTACAC <b>AGGAAGT</b> CACTCTTTCCCTACACGAC                          |
| 14                                                       | AATGATACGGCGACCACCGAGATCTACAC <b>ACTTACT</b> ACACTCTTTCCCTACACGAC                         |
| 15                                                       | AATGATACGGCGACCACCGAGATCTACAC <b>GCGGAGCG</b> AACTCTTTCCCTACACGAC                         |
| 16                                                       | AATGATACGGCGACCACCGAGATCTACAC <b>GCGCCTCT</b> AACTCTTTCCCTACACGAC                         |

  

| <b>First half of non-bold sequences are adapters P7,</b> |                                                                                           |
|----------------------------------------------------------|-------------------------------------------------------------------------------------------|
| <b>PCR2-R</b>                                            | <b>bold sequences are indexes i7, second half of non-bold sequences are partial RD2SP</b> |
| 1                                                        | CAAGCAGAAGACGGCATACGAGAT <b>ATGCGGCTGTG</b> ACTGGAGTTCAGACGTG                             |
| 2                                                        | CAAGCAGAAGACGGCATACGAGAT <b>GCCTCTCTGTG</b> ACTGGAGTTCAGACGTG                             |
| 3                                                        | CAAGCAGAAGACGGCATACGAGAT <b>GCCGTAGGGTGTG</b> ACTGGAGTTCAGACGTG                           |
| 4                                                        | CAAGCAGAAGACGGCATACGAGAT <b>GGTCACGAGTGTG</b> ACTGGAGTTCAGACGTG                           |
| 5                                                        | CAAGCAGAAGACGGCATACGAGAT <b>ACAGTGGTGTG</b> ACTGGAGTTCAGACGTG                             |
| 6                                                        | CAAGCAGAAGACGGCATACGAGAT <b>CAGATCCAGTGTG</b> ACTGGAGTTCAGACGTG                           |
| 7                                                        | CAAGCAGAAGACGGCATACGAGAT <b>GTGAATATGTG</b> ACTGGAGTTCAGACGTG                             |
| 8                                                        | CAAGCAGAAGACGGCATACGAGAT <b>CATAGAGTGTG</b> ACTGGAGTTCAGACGTG                             |
| 9                                                        | CAAGCAGAAGACGGCATACGAGAT <b>TTATAACCGTGTG</b> ACTGGAGTTCAGACGTG                           |
| 10                                                       | CAAGCAGAAGACGGCATACGAGAT <b>TGGACTTGGGTGTG</b> ACTGGAGTTCAGACGTG                          |
| 11                                                       | CAAGCAGAAGACGGCATACGAGAT <b>ATCCACTGGTGTG</b> ACTGGAGTTCAGACGTG                           |
| 12                                                       | CAAGCAGAAGACGGCATACGAGAT <b>CAAGCTAGGTGTG</b> ACTGGAGTTCAGACGTG                           |
| 13                                                       | CAAGCAGAAGACGGCATACGAGAT <b>CTGCTTCCGTGTG</b> ACTGGAGTTCAGACGTG                           |
| 14                                                       | CAAGCAGAAGACGGCATACGAGAT <b>CCAAGTCTGTG</b> ACTGGAGTTCAGACGTG                             |
| 15                                                       | CAAGCAGAAGACGGCATACGAGAT <b>ACTGCTTAGTGTG</b> ACTGGAGTTCAGACGTG                           |

**Table S3 Alpha diversity indicated by observed features, evenness and shannon index among all samples.**

| <b>Groups</b> | <b>Sample name</b> | <b>Observed_features</b> | <b>Evenness</b> | <b>Shannon index</b> |
|---------------|--------------------|--------------------------|-----------------|----------------------|
| Flower buds   | Flower buds1       | 74                       | 0.677800575     | 4.208771063          |
|               | Flower buds2       | 81                       | 0.651743629     | 4.131956846          |
|               | Flower buds3       | 86                       | 0.714507475     | 4.591614201          |
|               | Flower buds4       | 90                       | 0.619965963     | 4.024727958          |
|               | Flower buds5       | 61                       | 0.698545253     | 4.142888416          |
|               | Flower buds6       | 95                       | 0.643758812     | 4.229402443          |
|               | Flower buds7       | 67                       | 0.676073047     | 4.101119404          |
| Young pods    | Young pods1        | 81                       | 0.814458473     | 5.163544555          |
|               | Young pods2        | 87                       | 0.773918216     | 4.986311335          |
|               | Young pods3        | 105                      | 0.732154004     | 4.91586174           |
|               | Young pods4        | 58                       | 0.700579994     | 4.10398429           |
|               | Young pods5        | 136                      | 0.794678935     | 5.632257423          |
|               | Young pods6        | 162                      | 0.76897906      | 5.644190958          |
|               | Young pods7        | 117                      | 0.783035731     | 5.379741063          |
| 20daf seeds   | 20daf seeds1       | 258                      | 0.615745396     | 4.932876295          |
|               | 20daf seeds2       | 242                      | 0.699489544     | 5.539162034          |
|               | 20daf seeds3       | 298                      | 0.698196758     | 5.738596818          |
|               | 20daf seeds4       | 155                      | 0.811035608     | 5.901195983          |
|               | 20daf seeds5       | 191                      | 0.711868235     | 5.394130884          |
|               | 20daf seeds6       | 254                      | 0.777851801     | 6.214012773          |
|               | 20daf seeds7       | 162                      | 0.619254663     | 4.545236338          |
|               | 20daf seeds8       | 172                      | 0.69898981      | 5.190883391          |
| 30daf seeds   | 30daf seeds1       | 206                      | 0.770792543     | 5.924697292          |
|               | 30daf seeds2       | 158                      | 0.737952357     | 5.389842216          |
|               | 30daf seeds3       | 131                      | 0.793044146     | 5.577814936          |
|               | 30daf seeds4       | 128                      | 0.62123878      | 4.348671459          |
|               | 30daf seeds5       | 137                      | 0.730557685     | 5.185521886          |
|               | 30daf seeds6       | 241                      | 0.689885562     | 5.458988104          |
| 40daf seeds   | 40daf seeds1       | 271                      | 0.618930016     | 5.002284639          |
|               | 40daf seeds2       | 274                      | 0.760643975     | 6.159719312          |
|               | 40daf seeds3       | 193                      | 0.860197352     | 6.531011442          |
|               | 40daf seeds4       | 243                      | 0.732151141     | 5.802160516          |
|               | 40daf seeds5       | 163                      | 0.717614496     | 5.273553848          |
|               | 40daf seeds6       | 224                      | 0.794511404     | 6.203032521          |
|               | 40daf seeds7       | 333                      | 0.746045333     | 6.251396124          |
|               | 40daf seeds8       | 394                      | 0.842233492     | 7.26178081           |

| Groups           | Sample name     | Observed_features | Evenness    | Shannon index |
|------------------|-----------------|-------------------|-------------|---------------|
| 50daf seeds      | 50daf seeds1    | 223               | 0.859993892 | 6.708726263   |
|                  | 50daf seeds2    | 130               | 0.839525557 | 5.895457247   |
|                  | 50daf seeds3    | 235               | 0.799023791 | 6.29352443    |
|                  | 50daf seeds4    | 263               | 0.875269343 | 7.036219341   |
|                  | 50daf seeds5    | 96                | 0.841171849 | 5.539085081   |
|                  | 50daf seeds6    | 299               | 0.878633277 | 7.225881541   |
|                  | 50daf seeds7    | 218               | 0.868905744 | 6.749819982   |
| Parental seeds   | Parental seeds1 | 523               | 0.784946237 | 7.088588189   |
|                  | Parental seeds2 | 222               | 0.13472536  | 1.050105486   |
|                  | Parental seeds3 | 119               | 0.108934419 | 0.75108297    |
|                  | Parental seeds4 | 260               | 0.203567695 | 1.633094927   |
|                  | Parental seeds5 | 204               | 0.304043035 | 2.332747489   |
|                  | Parental seeds6 | 291               | 0.266102245 | 2.178013704   |
| Mature seeds     | Mature seeds1   | 367               | 0.787940448 | 6.712966009   |
|                  | Mature seeds2   | 369               | 0.378592138 | 3.228435752   |
|                  | Mature seeds3   | 136               | 0.256623013 | 1.818806072   |
|                  | Mature seeds4   | 244               | 0.201063004 | 1.594577871   |
|                  | Mature seeds5   | 172               | 0.157306667 | 1.168200959   |
|                  | Mature seeds6   | 328               | 0.569397799 | 4.758771717   |
| negative control | YX1             | 1                 |             |               |
|                  | YX2             | 5                 |             |               |
|                  | YX3             | 11                |             |               |
|                  | YX4             | 0                 |             |               |
|                  | YX5             | 5                 |             |               |
|                  | YX6             | 5                 |             |               |

**Table S4 Beta diversity among all groups. Significance of the microbial community dissimilarities among different groups was based on PERMANOVA tests.**

| Groups          |                |            | Groups          |                |            |
|-----------------|----------------|------------|-----------------|----------------|------------|
| <i>P</i> -value |                |            | <i>P</i> -value |                |            |
| Flower buds     | Young pods     | 0.0007999  | 20daf seeds     | 40daf seeds    | 0.0002     |
| Flower buds     | 20daf seeds    | 0.0005     | 20daf seeds     | 50daf seeds    | 0.0005     |
| Flower buds     | 30daf seeds    | 1.00E-04   | 20daf seeds     | Mature seeds   | 0.00069993 |
| Flower buds     | 40daf seeds    | 0.0003     | 20daf seeds     | Parental seeds | 0.00029997 |
| Flower buds     | 50daf seeds    | 0.0007999  | 30daf seeds     | 40daf seeds    | 0.0004     |
| Flower buds     | Mature seeds   | 0.00079992 | 30daf seeds     | 50daf seeds    | 0.0008999  |
| Flower buds     | Parental seeds | 0.00059994 | 30daf seeds     | Mature seeds   | 0.00159984 |
| Young pods      | 20daf seeds    | 0.0028997  | 30daf seeds     | Parental seeds | 0.00169983 |
| Young pods      | 30daf seeds    | 0.0012999  | 40daf seeds     | 50daf seeds    | 0.0011999  |
| Young pods      | 40daf seeds    | 0.0003     | 40daf seeds     | Mature seeds   | 0.00039996 |
| Young pods      | 50daf seeds    | 0.0006999  | 40daf seeds     | Parental seeds | 0.00029997 |
| Young pods      | Mature seeds   | 0.0009999  | 50daf seeds     | Parental seeds | 0.00079992 |
| Young pods      | Parental seeds | 0.00089991 | 50daf seeds     | Mature seeds   | 0.00079992 |
| 20daf seeds     | 30daf seeds    | 0.0004     | Parental seeds  | Mature seeds   | 0.5941406  |

**Table S5 The taxa with relative abundance greater than 1% of seed microbiota at the phylum level.**

|                     | Parental<br>seeds | Mature<br>seeds | Flower<br>buds | Young<br>pods | 20daf<br>seeds | 30daf<br>seeds | 40daf<br>seeds | 50daf<br>seeds |
|---------------------|-------------------|-----------------|----------------|---------------|----------------|----------------|----------------|----------------|
| Gammaproteobacteria | 84.04             | 78.77           | 23.91          | 30.64         | 32.05          | 34.12          | 23.80          | 24.72          |
| Actinobacteriota    | 3.82              | 4.38            | 34.51          | 26.98         | 25.11          | 24.93          | 21.44          | 28.53          |
| Firmicutes          | 1.72              | 2.76            | 13.49          | 13.61         | 21.24          | 28.79          | 34.66          | 22.13          |
| Alphaproteobacteria | 8.66              | 11.72           | 8.08           | 12.33         | 7.14           | 7.01           | 14.73          | 17.74          |
| Bacteroidota        | 0.52              | 0.98            | 15.90          | 11.39         | 11.29          | 4.10           | 3.40           | 4.43           |
| Fusobacteriota      | 0.30              | 0.25            | 2.72           | 1.99          | 1.92           | 0.54           | 0.71           | 0.77           |
| Others              | 0.93              | 1.13            | 1.39           | 3.05          | 1.25           | 0.50           | 1.26           | 1.67           |

**Differential taxa of seed microbiota at the phylum level.**

| Phylum              | Enrich in Groups (LDA=2) |
|---------------------|--------------------------|
| Un Proteobacteria   | Parental seeds           |
| Gammaproteobacteria | Parental seeds           |
| Alphaproteobacteria | 50daf seeds              |
| Bdellovibrionota    | 40daf seeds              |
| Firmicutes          | 40daf seeds              |
| Fusobacteriota      | Flower buds              |
| Bacteroidota        | Flower buds              |
| Actinobacteriota    | Flower buds              |

**Table S6 Top 10 genera in relative abundance (%) of each group.**

| <b>Genus</b>      | <b>Flower buds</b>    | <b>Genus</b>       | <b>Young pods</b>   | <b>Genus</b>       | <b>20daf seeds</b> |
|-------------------|-----------------------|--------------------|---------------------|--------------------|--------------------|
| Actinomyces       | 28.12                 | Actinomyces        | 20.08               | Actinomyces        | 16.92              |
| Neisseria         | 10.27                 | Streptococcus      | 8.35                | Streptococcus      | 13.49              |
| Streptococcus     | 9.09                  | Brevundimonas      | 6.77                | Neisseria          | 8.43               |
| Prevotella        | 7.23                  | Haemophilus        | 6.23                | Rhodanobacteraceae | 4.97               |
| Haemophilus       | 5.35                  | Pseudomonas        | 5.94                | Haemophilus        | 4.96               |
| Alloprevotella    | 4.63                  | Prevotella         | 5.09                | Lautropia          | 4.65               |
| Brevundimonas     | 3.32                  | Alloprevotella     | 4.85                | Alloprevotella     | 4.08               |
| Capnocytophaga    | 3.08                  | Neisseria          | 4.58                | Prevotella         | 3.59               |
| Granulicatella    | 2.49                  | Corynebacterium    | 3.06                | Brevundimonas      | 3.42               |
| Corynebacterium   | 1.82                  | Staphylococcus     | 2.16                | Rothia             | 2.38               |
| Others            | 24.60                 | Others             | 32.90               | Others             | 33.10              |
| <b>Genus</b>      | <b>30daf seeds</b>    | <b>Genus</b>       | <b>40daf seeds</b>  | <b>Genus</b>       | <b>50daf seeds</b> |
| Staphylococcus    | 19.37                 | Bacillus           | 14.12               | Staphylococcus     | 10.98              |
| Corynebacterium   | 14.59                 | Staphylococcus     | 10.24               | Corynebacterium    | 8.75               |
| Alicyclophilus    | 7.68                  | Corynebacterium    | 7.53                | Actinomyces        | 5.77               |
| Pseudomonas       | 6.65                  | Rhodanobacteraceae | 5.01                | Streptococcus      | 5.59               |
| Ralstonia         | 5.91                  | Allorhizobium      | 4.82                | Sphingomonas       | 3.68               |
| Actinomyces       | 5.29                  | Streptococcus      | 3.72                | Comamonadaceae     | 3.62               |
| Streptococcus     | 3.65                  | Comamonadaceae     | 3.58                | Brevundimonas      | 3.38               |
| Limnobacter       | 1.95                  | Actinomyces        | 2.30                | Alicyclophilus     | 2.69               |
| Anaerococcus      | 1.78                  | Rhodococcus        | 2.18                | Neisseria          | 2.48               |
| Neisseria         | 1.72                  | Paenibacillus      | 1.82                | Massilia           | 2.23               |
| Others            | 31.41                 | Others             | 44.68               | Others             | 50.83              |
| <b>Genus</b>      | <b>Parental seeds</b> | <b>Genus</b>       | <b>Mature seeds</b> |                    |                    |
| Ralstonia         | 71.98                 | Ralstonia          | 61.99               |                    |                    |
| Delftia           | 3.05                  | Bosea              | 3.12                |                    |                    |
| Bosea             | 2.57                  | Pseudomonas        | 2.48                |                    |                    |
| Ochrobactrum      | 1.92                  | Comamonadaceae     | 1.85                |                    |                    |
| Comamonadaceae    | 1.70                  | Caulobacteraceae2  | 1.80                |                    |                    |
| Pseudomonas       | 1.11                  | Actinomyces        | 1.60                |                    |                    |
| Knoellia          | 1.01                  | Ochrobactrum       | 1.59                |                    |                    |
| Oxalobacteraceae  | 0.88                  | Delftia            | 1.47                |                    |                    |
| Actinomyces       | 0.88                  | Pantoea            | 1.17                |                    |                    |
| Caulobacteraceae2 | 0.81                  | Erwinia            | 1.00                |                    |                    |
| Others            | 14.09                 | Others             | 21.93               |                    |                    |



**Differential taxa of seed microbiota at the genus level.**

| <b>thresholds (LDA=4)</b>                          | <b>Enrich in Groups</b> |
|----------------------------------------------------|-------------------------|
| Delftia                                            | Parental seeds          |
| Proteobacteria                                     | Parental seeds          |
| Ochrobactrum                                       | Parental seeds          |
| Ralstonia                                          | Parental seeds          |
| Sphingomonas                                       | 50daf seeds             |
| Comamonadaceae                                     | 50daf seeds             |
| Rhodococcus                                        | 40daf seeds             |
| Rhodanobacteraceae                                 | 40daf seeds             |
| Bacillus                                           | 40daf seeds             |
| Allorhizobium_Neorhizobium_Pararhizobium_Rhizobium | 40daf seeds             |
| Alicyclophilus                                     | 30daf seeds             |
| Staphylococcus                                     | 30daf seeds             |
| Corynebacterium                                    | 30daf seeds             |
| Streptococcus                                      | 20daf seeds             |
| Rothia                                             | 20daf seeds             |
| Lautropia                                          | 20daf seeds             |
| Alloprevotella                                     | Young pods              |
| Brevundimonas                                      | Young pods              |
| Microbacterium                                     | Young pods              |
| Haemophilus                                        | Young pods              |
| Capnocytophaga                                     | Flower buds             |
| Actinomyces                                        | Flower buds             |
| Neisseria                                          | Flower buds             |
| Prevotella                                         | Flower buds             |
| Granulicatella                                     | Flower buds             |

**Table S7 The top 20 functions with abundance relative of seed microbiota at second level.**

| <b>KEGG pathways (%)</b>                    | <b>Flower buds</b> | <b>Young pods</b> | <b>20daf seeds</b> | <b>30daf seeds</b> | <b>40daf seeds</b> | <b>50daf seeds</b> |
|---------------------------------------------|--------------------|-------------------|--------------------|--------------------|--------------------|--------------------|
| Amino acid metabolism                       | 10.29              | 10.53             | 10.39              | 10.96              | 11.06              | 11.09              |
| Metabolism of cofactors and vitamins        | 10.43              | 9.70              | 10.17              | 9.58               | 9.66               | 9.31               |
| Carbohydrate metabolism                     | 9.95               | 9.59              | 9.71               | 9.51               | 9.72               | 9.59               |
| Metabolism of other amino acids             | 7.71               | 7.33              | 7.59               | 7.39               | 7.16               | 7.19               |
| Lipid metabolism                            | 4.73               | 5.25              | 4.99               | 5.84               | 6.11               | 6.10               |
| Global and overview maps                    | 5.51               | 5.45              | 5.49               | 5.56               | 5.50               | 5.50               |
| Biosynthesis of other secondary metabolites | 5.59               | 5.31              | 5.57               | 4.81               | 5.00               | 4.98               |
| Xenobiotics biodegradation and metabolism   | 3.46               | 5.02              | 3.87               | 5.61               | 5.58               | 6.02               |
| Replication and repair                      | 5.44               | 4.76              | 5.17               | 4.46               | 4.37               | 4.37               |
| Energy metabolism                           | 4.43               | 4.18              | 4.28               | 4.12               | 4.01               | 3.98               |
| Glycan biosynthesis and metabolism          | 4.36               | 3.50              | 3.94               | 2.80               | 2.86               | 2.85               |
| Metabolism of terpenoids and polyketides    | 2.82               | 3.20              | 2.86               | 3.44               | 3.50               | 3.57               |
| Folding sorting and degradation             | 2.98               | 2.76              | 2.92               | 2.85               | 2.75               | 2.65               |
| Translation                                 | 3.06               | 2.61              | 2.92               | 2.40               | 2.31               | 2.34               |
| Cell motility                               | 1.32               | 2.32              | 1.93               | 2.77               | 2.97               | 2.51               |
| Cell growth and death                       | 2.17               | 2.08              | 1.96               | 1.88               | 1.85               | 1.96               |
| Membrane transport                          | 1.74               | 1.87              | 1.82               | 1.92               | 1.75               | 1.68               |
| Drug resistance: antimicrobial              | 1.82               | 1.74              | 1.85               | 1.67               | 1.58               | 1.54               |
| Cellular community - prokaryotes            | 1.30               | 1.62              | 1.51               | 1.70               | 1.56               | 1.48               |
| Nucleotide metabolism                       | 1.65               | 1.46              | 1.57               | 1.35               | 1.32               | 1.31               |
| Others                                      | 9.23               | 9.74              | 9.48               | 9.38               | 9.39               | 9.98               |

**Table S8 The top 40 functions with abundance relative of seed microbiota at third level.**

| KEGG Level 3 (%)                                   | Flower<br>buds | Young<br>pods | 20daf<br>seeds | 30daf<br>seeds | 40daf<br>seeds | 50daf<br>seeds |
|----------------------------------------------------|----------------|---------------|----------------|----------------|----------------|----------------|
| Valine leucine and isoleucine biosynthesis         | 2.13           | 2.10          | 2.16           | 2.04           | 1.96           | 2.06           |
| D-Alanine metabolism                               | 2.18           | 1.96          | 2.18           | 2.05           | 1.83           | 1.81           |
| Lipoic acid metabolism                             | 2.06           | 1.64          | 1.86           | 1.66           | 1.73           | 1.61           |
| D-Glutamine and D-glutamate metabolism             | 1.99           | 1.70          | 1.84           | 1.60           | 1.52           | 1.57           |
| Synthesis and degradation of ketone bodies         | 0.97           | 1.41          | 1.19           | 1.90           | 1.93           | 2.05           |
| Fatty acid biosynthesis                            | 1.54           | 1.46          | 1.54           | 1.42           | 1.50           | 1.40           |
| Biosynthesis of amino acids                        | 1.46           | 1.35          | 1.43           | 1.34           | 1.30           | 1.30           |
| Biotin metabolism                                  | 1.30           | 1.37          | 1.41           | 1.36           | 1.42           | 1.31           |
| Cell cycle - Caulobacter                           | 1.51           | 1.43          | 1.39           | 1.23           | 1.28           | 1.31           |
| Biosynthesis of terpenoids and steroids            | 1.09           | 1.53          | 1.34           | 1.08           | 1.35           | 1.68           |
| Mismatch repair                                    | 1.54           | 1.33          | 1.45           | 1.25           | 1.18           | 1.18           |
| Bacterial chemotaxis                               | 0.77           | 1.33          | 1.06           | 1.50           | 1.64           | 1.39           |
| Aminoacyl-tRNA biosynthesis                        | 1.49           | 1.28          | 1.43           | 1.19           | 1.15           | 1.16           |
| Protein export                                     | 1.40           | 1.24          | 1.37           | 1.24           | 1.23           | 1.19           |
| Peptidoglycan biosynthesis                         | 1.43           | 1.25          | 1.42           | 1.20           | 1.24           | 1.14           |
| Streptomycin biosynthesis                          | 1.50           | 1.32          | 1.42           | 1.10           | 1.12           | 1.16           |
| Pantothenate and CoA biosynthesis                  | 1.34           | 1.24          | 1.31           | 1.21           | 1.20           | 1.21           |
| Ribosome                                           | 1.46           | 1.24          | 1.39           | 1.13           | 1.08           | 1.10           |
| One carbon pool by folate                          | 1.33           | 1.21          | 1.27           | 1.07           | 1.03           | 1.07           |
| Citrate cycle (TCA cycle)                          | 1.15           | 1.07          | 1.10           | 1.14           | 1.11           | 1.10           |
| Carbon fixation in photosynthetic organisms        | 1.27           | 1.13          | 1.21           | 1.00           | 1.00           | 1.02           |
| Drug metabolism - other enzymes                    | 1.17           | 1.11          | 1.15           | 1.00           | 1.01           | 1.04           |
| Selenocompound metabolism                          | 1.07           | 1.01          | 1.08           | 0.97           | 1.05           | 0.98           |
| Flagellar assembly                                 | 0.55           | 0.99          | 0.87           | 1.28           | 1.32           | 1.12           |
| Alanine aspartate and glutamate metabolism         | 1.08           | 0.98          | 1.04           | 0.94           | 0.98           | 0.95           |
| Pyruvate metabolism                                | 0.98           | 0.95          | 0.97           | 1.04           | 1.01           | 1.00           |
| Homologous recombination                           | 1.16           | 0.98          | 1.10           | 0.90           | 0.85           | 0.86           |
| Fatty acid metabolism                              | 0.88           | 0.94          | 0.91           | 1.00           | 1.04           | 1.01           |
| Thiamine metabolism                                | 0.95           | 0.91          | 0.98           | 1.00           | 1.01           | 0.91           |
| Lysine biosynthesis                                | 1.08           | 0.95          | 1.04           | 0.91           | 0.88           | 0.89           |
| Sulfur relay system                                | 0.90           | 0.91          | 0.89           | 1.05           | 0.96           | 0.91           |
| Vancomycin resistance                              | 1.09           | 0.94          | 1.04           | 0.86           | 0.84           | 0.83           |
| Glycolysis / Gluconeogenesis                       | 1.00           | 0.89          | 0.96           | 0.90           | 0.91           | 0.89           |
| Bacterial secretion system                         | 0.87           | 1.00          | 0.90           | 1.01           | 0.87           | 0.90           |
| Glycine serine and threonine metabolism            | 0.93           | 0.90          | 0.91           | 0.93           | 0.90           | 0.90           |
| Phenylalanine tyrosine and tryptophan biosynthesis | 0.99           | 0.89          | 0.96           | 0.84           | 0.80           | 0.81           |
| DNA replication                                    | 0.99           | 0.86          | 0.94           | 0.83           | 0.78           | 0.79           |
| C5-Branched dibasic acid metabolism                | 0.91           | 0.89          | 0.89           | 0.83           | 0.80           | 0.84           |
| Base excision repair                               | 0.89           | 0.83          | 0.89           | 0.81           | 0.82           | 0.81           |
| Glyoxylate and dicarboxylate metabolism            | 0.70           | 0.79          | 0.72           | 0.89           | 0.90           | 0.91           |
| Others                                             | 50.92          | 52.69         | 51.00          | 53.29          | 53.46          | 53.84          |

**Table S9 The composition and relative abundance of 61 core microbiota. The red part was the relative abundance of core ASV S1.**

| Genus (%)            | Parental seeds | Mature seeds | Flower buds  | Young pods   | 20daf seeds  | 30daf seeds  | 40daf seeds  | 50daf seeds  |
|----------------------|----------------|--------------|--------------|--------------|--------------|--------------|--------------|--------------|
| Ralstonia            | 70.816         | 61.219       | 1.122        | 1.671        | 0.323        | 5.805        | 0.212        | 0.271        |
| Actinomyces1         | 0.654          | 0.987        | 24.163       | 12.158       | 11.495       | 3.223        | 1.355        | 3.566        |
| Staphylococcus1      | 0.192          | 0.294        | 0.425        | 0.503        | 0.549        | 11.179       | 5.286        | 4.175        |
| Neisseria1           | 0.211          | 0.243        | 6.715        | 2.964        | 4.776        | 1.336        | 0.825        | 1.836        |
| Streptococcus1       | 0.213          | 0.113        | 4.958        | 2.590        | 4.519        | 1.445        | 0.989        | 1.914        |
| Brevundimonas        | 0.400          | 0.666        | 2.989        | 6.482        | 2.848        | 0.480        | 0.890        | 0.758        |
| Haemophilus1         | 0.151          | 0.216        | 2.989        | 5.306        | 3.752        | 1.418        | 0.313        | 0.819        |
| Actinomyces2         | 0.123          | 0.232        | 2.082        | 4.844        | 2.751        | 0.929        | 0.305        | 0.687        |
| Alicyclophilius      | 0.070          | 0.102        | 0.017        | 0.015        | 0.019        | 7.439        | 1.118        | 2.607        |
| Staphylococcus2      | 0.208          | 0.147        | 0.169        | 0.692        | 0.675        | 3.290        | 1.255        | 2.984        |
| Alloprevotella1      | 0.028          | 0.049        | 2.484        | 1.937        | 1.512        | 0.596        | 0.316        | 0.192        |
| Streptococcus2       | 0.118          | 0.169        | 1.106        | 0.675        | 2.760        | 0.849        | 0.691        | 0.717        |
| Allorhizobium        | 0.030          | 0.104        | 0.849        | 0.021        | 0.242        | 0.004        | 4.366        | 0.356        |
| Lautropia            | 0.033          | 0.078        | 0.251        | 0.371        | 4.654        | 0.152        | 0.078        | 0.306        |
| Actinomyces3         | 0.018          | 0.005        | 1.593        | 1.879        | 1.232        | 0.476        | 0.390        | 0.291        |
| Prevotella1          | 0.049          | 0.011        | 2.413        | 1.290        | 0.884        | 0.183        | 0.002        | 0.743        |
| Corynebacterium1     | 0.089          | 0.021        | 0.059        | 0.070        | 0.187        | 3.112        | 1.047        | 0.856        |
| Streptococcus3       | 0.053          | 0.063        | 0.873        | 1.917        | 0.881        | 0.172        | 0.149        | 1.192        |
| Novosphingobium      | 0.147          | 0.008        | 0.716        | 1.337        | 0.255        | 0.040        | 0.527        | 1.953        |
| Neisseria2           | 0.108          | 0.064        | 1.505        | 1.021        | 1.591        | 0.129        | 0.069        | 0.166        |
| Granulicatella1      | 0.091          | 0.024        | 1.675        | 0.835        | 0.986        | 0.506        | 0.004        | 0.191        |
| Haemophilus2         | 0.017          | 0.011        | 2.352        | 0.861        | 0.695        | 0.090        | 0.139        | 0.144        |
| Fusobacterium        | 0.192          | 0.183        | 1.154        | 1.167        | 0.678        | 0.141        | 0.436        | 0.119        |
| Escherichia-Shigella | 0.003          | 0.062        | 0.855        | 0.668        | 0.189        | 0.024        | 1.584        | 0.408        |
| Capnocytophaga       | 0.034          | 0.021        | 1.274        | 0.678        | 0.811        | 0.601        | 0.027        | 0.305        |
| Prevotella2          | 0.034          | 0.013        | 2.206        | 0.331        | 0.705        | 0.117        | 0.048        | 0.022        |
| Streptococcus4       | 0.012          | 0.051        | 0.560        | 0.975        | 0.974        | 0.407        | 0.081        | 0.402        |
| Alloprevotella2      | 0.003          | 0.054        | 1.042        | 1.239        | 0.730        | 0.333        | 0.010        | 0.003        |
| Ochrobactrum         | 1.646          | 1.390        | 0.020        | 0.009        | 0.001        | 0.010        | 0.009        | 0.048        |
| Enterobacteriaceae   | 0.252          | 0.018        | 0.179        | 0.803        | 0.760        | 0.577        | 0.402        | 0.082        |
| Streptococcus5       | 0.007          | 0.027        | 0.982        | 0.597        | 0.435        | 0.064        | 0.250        | 0.464        |
| Streptococcus6       | 0.050          | 0.204        | 0.031        | 0.348        | 1.283        | 0.289        | 0.182        | 0.380        |
| Alloprevotella3      | 0.022          | 0.011        | 0.656        | 1.080        | 0.731        | 0.133        | 0.015        | 0.096        |
| Comamonadaceae1      | 0.068          | 0.062        | 0.167        | 0.048        | 0.202        | 0.141        | 1.230        | 0.683        |
| Corynebacterium2     | 0.006          | 0.013        | 0.469        | 1.166        | 0.530        | 0.142        | 0.156        | 0.046        |
| Microbacterium       | 0.020          | 0.034        | 0.262        | 0.801        | 0.060        | 0.195        | 0.437        | 0.660        |
| Streptococcus7       | 0.013          | 0.007        | 0.013        | 0.020        | 1.975        | 0.018        | 0.238        | 0.014        |
| Bosea1               | 0.171          | 0.084        | 0.406        | 0.217        | 0.079        | 0.496        | 0.222        | 0.476        |
| <b>Sphingomonas1</b> | <b>0.237</b>   | <b>0.301</b> | <b>0.357</b> | <b>0.322</b> | <b>0.041</b> | <b>0.133</b> | <b>0.457</b> | <b>0.280</b> |
| Kingella             | 0.008          | 0.020        | 0.630        | 0.696        | 0.513        | 0.137        | 0.054        | 0.029        |

| <b>Genus (%)</b> | <b>Parental<br/>seeds</b> | <b>Mature<br/>seeds</b> | <b>Flower<br/>buds</b> | <b>Young<br/>pods</b> | <b>20daf<br/>seeds</b> | <b>30daf<br/>seeds</b> | <b>40daf<br/>seeds</b> | <b>50daf<br/>seeds</b> |
|------------------|---------------------------|-------------------------|------------------------|-----------------------|------------------------|------------------------|------------------------|------------------------|
| Leptotrichia     | 0.080                     | 0.064                   | 0.428                  | 0.616                 | 0.413                  | 0.154                  | 0.023                  | 0.079                  |
| Granulicatella2  | 0.001                     | 0.005                   | 0.458                  | 1.036                 | 0.136                  | 0.030                  | 0.091                  | 0.065                  |
| Janibacter       | 0.026                     | 0.046                   | 0.165                  | 0.040                 | 0.077                  | 0.316                  | 0.610                  | 0.372                  |
| Bosea2           | 0.008                     | 0.037                   | 0.070                  | 0.708                 | 0.091                  | 0.068                  | 0.061                  | 0.338                  |
| Comamonadaceae2  | 0.008                     | 0.021                   | 0.070                  | 0.025                 | 0.007                  | 0.170                  | 0.859                  | 0.183                  |
| Staphylococcus3  | 0.068                     | 0.068                   | 0.294                  | 0.215                 | 0.056                  | 0.038                  | 0.077                  | 0.379                  |
| Diaphorobacter   | 0.003                     | 0.118                   | 0.030                  | 0.001                 | 0.016                  | 0.571                  | 0.132                  | 0.225                  |
| Streptococcus8   | 0.002                     | 0.019                   | 0.002                  | 0.887                 | 0.150                  | 0.002                  | 0.011                  | 0.009                  |
| Streptococcus9   | 0.004                     | 0.034                   | 0.199                  | 0.012                 | 0.173                  | 0.020                  | 0.450                  | 0.102                  |
| Bacillus         | 0.044                     | 0.031                   | 0.006                  | 0.037                 | 0.252                  | 0.274                  | 0.294                  | 0.033                  |
| Stenotrophomonas | 0.056                     | 0.375                   | 0.005                  | 0.213                 | 0.006                  | 0.209                  | 0.039                  | 0.063                  |
| Sphingomonas2    | 0.005                     | 0.051                   | 0.040                  | 0.462                 | 0.025                  | 0.075                  | 0.052                  | 0.199                  |
| Phyllobacterium  | 0.098                     | 0.111                   | 0.088                  | 0.311                 | 0.001                  | 0.087                  | 0.004                  | 0.142                  |
| Aerococcus       | 0.003                     | 0.011                   | 0.024                  | 0.034                 | 0.332                  | 0.026                  | 0.152                  | 0.232                  |
| Rothia           | 0.003                     | 0.011                   | 0.289                  | 0.107                 | 0.194                  | 0.009                  | 0.125                  | 0.040                  |
| Prevotella3      | 0.003                     | 0.008                   | 0.007                  | 0.309                 | 0.324                  | 0.086                  | 0.001                  | 0.038                  |
| Corynebacterium3 | 0.006                     | 0.004                   | 0.043                  | 0.022                 | 0.004                  | 0.378                  | 0.011                  | 0.228                  |
| Kytococcus       | 0.004                     | 0.019                   | 0.007                  | 0.003                 | 0.043                  | 0.056                  | 0.331                  | 0.196                  |
| Cutibacterium    | 0.004                     | 0.020                   | 0.016                  | 0.005                 | 0.028                  | 0.018                  | 0.149                  | 0.223                  |
| Chryseobacterium | 0.019                     | 0.003                   | 0.040                  | 0.019                 | 0.010                  | 0.043                  | 0.197                  | 0.117                  |
| Acidisoma        | 0.044                     | 0.030                   | 0.012                  | 0.024                 | 0.031                  | 0.010                  | 0.132                  | 0.110                  |

**Table S10 The composition and relative abundance of 28 missing core microbiota.**

| <b>Relative abundance(%)</b> | Flower buds | Young pods | 20daf seeds | 30daf seeds | 40daf seeds | 50daf seeds |
|------------------------------|-------------|------------|-------------|-------------|-------------|-------------|
| Corynebacterium2             | 0.961       | 0.758      | 0.494       | 0.165       | 0.018       | 0.068       |
| Microbacterium               | 0.287       | 0.751      | 0.539       | 0.138       | 0.051       | 0.224       |
| Corynebacterium3             | 0.067       | 0.065      | 0.030       | 1.302       | 0.292       | 0.179       |
| Actinomyces3                 | 0.193       | 0.354      | 0.591       | 0.376       | 0.031       | 0.248       |
| Alloprevotella               | 0.265       | 0.454      | 0.749       | 0.158       | 0.004       | 0.085       |
| Enterobacteriaceae           | 0.149       | 0.627      | 0.230       | 0.039       | 0.217       | 0.444       |
| Corynebacteriaceae           | 0.033       | 0.028      | 0.055       | 0.074       | 0.700       | 0.616       |
| Capnocytophaga               | 0.972       | 0.068      | 0.339       | 0.059       | 0.011       | 0.045       |
| Pasteurellaceae              | 0.458       | 0.448      | 0.291       | 0.162       | 0.004       | 0.050       |
| Lawsonella                   | 0.058       | 0.111      | 0.131       | 0.094       | 0.251       | 0.478       |
| Streptococcus                | 0.339       | 0.242      | 0.223       | 0.095       | 0.066       | 0.038       |
| Delftia                      | 0.028       | 0.210      | 0.083       | 0.350       | 0.120       | 0.135       |
| Cloacibacterium              | 0.009       | 0.035      | 0.004       | 0.500       | 0.158       | 0.198       |
| Leptotrichia                 | 0.526       | 0.123      | 0.077       | 0.078       | 0.012       | 0.059       |
| Corynebacterium4             | 0.003       | 0.025      | 0.005       | 0.085       | 0.202       | 0.543       |
| Rothia                       | 0.002       | 0.055      | 0.063       | 0.080       | 0.048       | 0.595       |
| Cutibacterium                | 0.007       | 0.030      | 0.033       | 0.013       | 0.212       | 0.394       |
| Jeotgalicoccus               | 0.020       | 0.009      | 0.061       | 0.001       | 0.038       | 0.547       |
| Corynebacterium1             | 0.123       | 0.397      | 0.002       | 0.005       | 0.016       | 0.093       |
| Afipia                       | 0.002       | 0.007      | 0.028       | 0.089       | 0.060       | 0.417       |
| Massilia                     | 0.008       | 0.007      | 0.032       | 0.028       | 0.128       | 0.397       |
| Comamonadaceae               | 0.019       | 0.024      | 0.002       | 0.108       | 0.232       | 0.189       |
| Actinomyces2                 | 0.004       | 0.070      | 0.239       | 0.078       | 0.025       | 0.127       |
| Escherichia-Shigella         | 0.023       | 0.056      | 0.007       | 0.012       | 0.160       | 0.089       |
| Atopostipes                  | 0.023       | 0.007      | 0.066       | 0.011       | 0.081       | 0.125       |
| Pseudomonas                  | 0.020       | 0.022      | 0.008       | 0.036       | 0.040       | 0.173       |
| Haemophilus                  | 0.010       | 0.002      | 0.039       | 0.155       | 0.038       | 0.002       |
| Actinomyces1                 | 0.005       | 0.129      | 0.019       | 0.059       | 0.004       | 0.021       |

**Table S11 The number of reads of ASVs among the samples of negative control and the ASVs labeled in **red** were overlapped with core microbiota.**

| ASVs in negative control | Sample1 | Sample2 | Sample3 | Sample4 | Sample5 | Sample6 |
|--------------------------|---------|---------|---------|---------|---------|---------|
| <b>Actinomyces</b>       | 0       | 0       | 22      | 0       | 12      | 26      |
| Cellvibrio               | 0       | 0       | 43      | 0       | 0       | 0       |
| Pseudomonas              | 0       | 15      | 0       | 0       | 0       | 0       |
| Arenimonas               | 0       | 0       | 14      | 0       | 0       | 0       |
| Anaerococcus             | 0       | 13      | 0       | 0       | 0       | 0       |
| Corynebacterium          | 0       | 0       | 12      | 0       | 0       | 0       |
| Comamonadaceae           | 0       | 10      | 0       | 0       | 0       | 0       |
| Xanthomonadaceae         | 0       | 10      | 0       | 0       | 0       | 0       |
| Bacteria                 | 9       | 0       | 0       | 0       | 0       | 0       |
| Massilia                 | 0       | 0       | 9       | 0       | 0       | 0       |
| <b>Corynebacterium</b>   | 0       | 0       | 0       | 0       | 0       | 8       |
| uncultured Neisseriaceae | 0       | 0       | 7       | 0       | 0       | 0       |
| Sordariomycetes          | 0       | 0       | 0       | 0       | 0       | 6       |
| Prevotella               | 0       | 0       | 6       | 0       | 0       | 0       |
| <b>Neisseria</b>         | 0       | 0       | 0       | 0       | 0       | 5       |
| Corynebacterium          | 0       | 5       | 0       | 0       | 0       | 0       |
| Ralstonia                | 0       | 0       | 5       | 0       | 0       | 0       |
| Faecalibacterium         | 0       | 0       | 5       | 0       | 0       | 0       |
| <b>Haemophilus</b>       | 0       | 0       | 0       | 0       | 4       | 0       |
| <b>Neisseria</b>         | 0       | 0       | 0       | 0       | 4       | 0       |
| <b>Stenotrophomonas</b>  | 0       | 0       | 4       | 0       | 0       | 0       |
| Neisseria                | 0       | 0       | 4       | 0       | 0       | 0       |
| Ralstonia                | 0       | 0       | 0       | 0       | 4       | 0       |
| <b>Prevotella</b>        | 0       | 0       | 0       | 0       | 3       | 0       |
| Leptotrichia             | 0       | 0       | 0       | 0       | 0       | 2       |

**Table S12 16S rRNA gene sequence of Core ASV S1, *Sp. endophytica* and *Ralstonia pickettii***

**>the 16S rRNA gene of core ASV *Sphingomonas***

GTAGTCCACGCCGTAAACGATGATAACTAGCTGTCCGGGCACTTGGTGCTTGGGTGGC  
GCAGCTAACGCATTAAGTTATCCGCCTGGGGAGTACGGTCGCAAGATTAAAACTCAAA  
GGAATTGACGGGGGCTGCACAAGCGGTGGAGCATGTGGTTTAATTCGAAGCAACGC  
GCAGAACCTTACCAGCGTTTGACATGTCCGGACGATTTCCAGAGATGGATCTCTTCCCT  
TCGGGGACTGGAACACAGGTGCTGCATGGCTGTCGTCAGCTCGTGTCTGTGAGATGTTG  
GGTTAAGTCCCGCAACGAGCGCAACCCTCGCCTTTAGTTACCATCATTTAGTTGGGGAC  
TCTAAAGGAACCGCCGGTGATAAGCCGGA

**>the 16S rRNA gene of strain *Sphingomonas endophytica***

GCAAGTCGAACGATGCTTTCGGGCATAGTGGCGCACGGGTGCGTAACGCGTGGAATC  
TGCCCTTGGGTCTGGGATAACAGTTGGAAACGACTGCTAATACCGGATGATATCGCGAG  
ATCAAAGATTTATCGCCCGAGGATGAGCCCGCGTAGGATTAGCTAGTTGGTGGGGTAAA  
GGCCTACCAAGGCGACGATCCTTAGCTGGTCTGAGAGGATGATCAGCCACACTGGGAC  
TGAGACACGGCCCGAGACTCCTACGGGAGGCAGCAGTGGGGAATATTGGACAATGGGC  
GAAAGCCTGATCCAGCAATGCCGCGTGAGTGATGAAGGCCTTAGGGTTGTAAAGCTCT  
TTTACCCGGGATGATAATGACAGTACCGGGAGAATAAGCCCCGGCTAACTCCGTGCCA  
GCAGCCGCGGTAATACGGAGGGGGGCTAGCGTTGTTTCGGAATTACTGGGCGTAAAGCGC  
ACGTAGGCGGCTTTGTAAAGTCAGGGGTGAAAGCCTGGAGCTCAACTCCAGAAGTACC  
TTTGAGACTGCATCGCTTGAATCCGGGAGAGGTAAGTGGAATTCCGAGTGTAAGGTTG  
AAATTCGTAGATATTCGGAAGAACACCAGTGGCGAAGGCGGCTTACTGGACCGGGATT  
GACGCTGAGGTGCGAAAGCGTGGGGAGCAAACAGGATTAGATACCCTGGTAGTCCAC  
GCCGTAAACGATGATAACTAGCTGTCCGGGGACTTGGTCTTTGGGTGGCGCAGCTAAC  
GCATTAAGTTATCCGCCTGGGGAGTACGGCCGCAAGGTTAAAACTCAAAGGAATTGAC  
GGGGGCCTGCACAAGCGGTGGAGCATGTGGTTTAATTCGAAGCAACGCGCAGAACCT  
TACCAGCGTTTGACATGTCCGGACGATTTCCAGAGATGGATCTCTTCCCTTCGGGGACT  
GGAACACAGGTGCTGCATGGCTGTCGTCAGCTCGTGTCTGTGAGATGTTGGGTAAAGTC  
CCGCAACGAGCGCAACCCTCGCCTTTAGTTACCATCATTTAGTTGGGTACTCTAAAGGA  
ACCGCCGGTGATAAGCCGGAGGAAGGTGGGGATGACGTCAAGTCCTCATGGCCCTTAC  
GCGCTGGGCTACACACGTGCTACAATGGCGACTACAGTGGGCTGCAATCCCGCGAGGG  
TGAGCTAATCTCCAAAAGTCGTCTCAGTTCGGATTGTTCTCTGCAACTCGAGAGCATGA  
AGGCGGAATCGCTAGTAATCGCGGATCAGCATGCCGCGGTGAATACGTTCCCAGGCCT  
TGTACACACCGCCCGTCACACCATGGGAGTTGGGTTACCCGAAGGCGTTGCGCTAAC  
CCGTAAGGGAGGCAG

**>the 16S rRNA gene of strain *Ralstonia pickettii***

GCAAGTCGAACGGCAGCATGATCTAGCTTGCTAGATTGATGGCGAGTGGCGAACGGGT  
GAGTAATACATCGGAACGTGCCCTGTAGTGGGGGATAACTAGTCGAAAGATTAGCTAAT  
ACCGCATACGACCTGAGGGTGAAAGTGGGGGACCGCAAGGCCTCATGCTATAGGAGC  
GGCCGATGTCTGATTAGCTAGTTGGTGGGGTAAAGGCCACCAAGGCGACGATCAGTA  
GCTGGTCTGAGAGGACGATCAGCCACACTGGGACTGAGACACGGCCCGAGACTCCTAC  
GGGAGGCAGCAGTGGGGAATTTTGACAATGGGCGAAAGCCTGATCCAGCAATGCCG



CGTGTGTGAAGAAGGCCTTCGGGTTGTAAAGCACTTTTGTCCGGAAAGAAATGGCTCT  
GGTTAATACCTGGGGTCGATGACGGTACCGGAAGAATAAGGACCGGCTAACTACGTGC  
CAGCAGCCGCGGTAATACGTAGGGTCCAAGCGTTAATCGGAATTACTGGGCGTAAAGC  
GTGCGCAGGCGGTTGTGCAAGACCGATGTGAAATCCCCGAGCTTAACTTGGGAATTGC  
ATTGGTGACTGCACGGCTAGAGTGTGTCAGAGGGGGGTAGAATTCCACGTGTAGCAGT  
GAAATGCGTAGAGATGTGGAGGAATACCGATGGCGAAGGCAGCCCCCTGGGATAACAC  
TGACGCTCATGCACGAAAGCGTGGGGAGCAAACAGGATTAGATACCCTGGTAGTCCAC  
GCCCTAAACGATGTCAACTAGTTGTTGGGGATTCAATTCCTTAGTAACGTAGCTAACGC  
GTGAAGTTGACCGCCTGGGGAGTACGGTCGCAAGATTAAACTCAAAGGAATTGACG  
GGGACCCGACAAAGCGGTGGATGATGTGGATTAATTCGATGCAACGCGAAAAACCTTA  
CCTACCCTTGACATGCCACTAACGAAGCAGAGATGCATTAGGTGCTCGAAAGAGAAAAG  
TGGACACAGGTGCTGCATGGCTGTCGTCAGCTCGTGTCTGAGATGTTGGGTAAAGTC  
CCGCAACGAGCGCAACCCTTGTCTCTAGTTGCTACGAAAGGGCACTCTAGAGAGACTG  
CCGGTGACAAACCGGAGGAAGGTGGGGATGACGTCAAGTCCTCATGGCCCTTATGGGT  
AGGGCTTCACACGTCATACAATGGTGCATACAGAGGGTTGCCAAGCCGCGAGGTGGA  
GCTAATCCAGAAAATGCATCGTAGTCCGGATCGTAGTCTGCAACTCGACTACGTGAA  
GCTGGAATCGCTAGTAATCGCGGATCAGCATGCCGCGGTGAATACGTTCCCGGGTCTTG  
TACACACCGCCCGTCACACCATGGGAGTGGGCTTTACCAGAAGTAGTTAGCCTAACCG  
CAAGGAGGGC

**The sequence information used to make the evolutionary tree in this research.**

| The name of 16S rRNA gene sequence in NCBI   | GenBank                             |
|----------------------------------------------|-------------------------------------|
| Sphingomonas yunnanensis strain 21           | MN737131.1                          |
| Sphingomonas yunnanensis strain SS1-22       | KU341396.1                          |
| Sphingomonas ginsenosidimutans strain P5-A12 | MK318623.1                          |
| Sphingomonas ginsenosidimutans strain 20ABL7 | MH482324.1                          |
| Sphingomonas adhaesiva JCM 7370              | LC504024.1                          |
| Sphingomonas adhaesiva strain DSM 7418       | KY927401.1                          |
| Sphingomonas melonis strain IITA-TZ131       | OM909380.1                          |
| Sphingomonas melonis strain 65_5a            | OP811591.1                          |
| Sphingomonas koreensis strain 234-LR45       | MF077172.1                          |
| Sphingomonas koreensis strain RS8B           | MG547700.1                          |
| Sphingomonas endophytica strain -Y72         | JX134635.1                          |
| Sphingomonas phyllosphaerae strain L6-296    | JQ659373.1                          |
| Sphingomonas phyllosphaerae strain L7-510    | JQ659443.1                          |
| Sphingobium indicum strain UT26S             | NCBI Reference Sequence NR_102886.2 |
| Sphingobium indicum strain NBRC 101211       | NCBI Reference Sequence NR_113986.1 |
| Sphingomonas phyllosphaerae strain L7-512    | JQ659446.1                          |
